# Supplementary material for: Human brains have shrunk: the questions are when and why
Source: Frontiers journal article supplement (doi:10.3389/fevo.2023.1191274), 2023-06-22
Supplement: Data_Sheet_1.xlsx [file Data_Sheet_1.xlsx]

## Sheet: Sheet1
Species	Specimen	CC	Source	Age (MA)	Source (for date)	Country	Landmass
Rudapithecus	RUD 200	234	Gunz et al., 2020	9.85	Begun	Hungary	Europe
Rudapithecus	RUD 77	326	Begun	9.85	Begun	Hungary	Europe
Sahelanthropus	TM 266-01-060	365	Falk	7		Chad	Africa
Ar. ramidus	ARA-VP-6/500	300	Suwa et al., 2009	4.4	White et al., 2009	Ethiopia	Africa
A. anamensis	MRD-VP-1/1	367	Haile-Selassie et al., 2019	3.8	Haile-Selassie et al., 2019	Ethiopia	Africa
A. afarensis	AL 162-28	393	Holloway, 1981	3.2		Ethiopia	Africa
A. afarensis	AL 333-45	488	Gunz et al., 2020	3.2		Ethiopia	Africa
A. afarensis	AL 288-1	388	Gunz et al., 2020	3.18		Ethiopia	Africa
A. afarensis	AL 822-1	382	Gunz et al., 2020	3.1	Kimbel & Rak, 2010	Ethiopia	Africa
A. afarensis	AL 444-2	522	Gunz et al., 2020	3		Ethiopia	Africa
A. africanus	MLD 1	510	Holloway et al., 2004	2.65		South Africa	Africa
A. africanus	MLD 37/38	430	Holloway et al., 2004	2.65		South Africa	Africa
A. aethiopicus	KNM-WT 17000	410	Holloway et al., 2004	2.5		Ethiopia	Africa
A. garhi	Bouri	450	Holloway et al., 2004	2.5		Ethiopia	Africa
A. boisei	Omo L388y-6	427	Holloway et al., 2004	2.38		Ethiopia	Africa
A. africanus	Stw 505	555	Holloway et al., 2004	2.35		South Africa	Africa
A. boisei	Omo 323-1976-896	490	Brown et al., 1993	2.23		Ethiopia	Africa
A. africanus	Sts 19/58	436	Holloway et al., 2004	2.1		South Africa	Africa
A. africanus	Sts 5	485	Holloway et al., 2004	2.1		South Africa	Africa
A. africanus	Sts 60	400	Holloway et al., 2004	2.1		South Africa	Africa
A. africanus	Sts 71	428	Holloway et al., 2004	2.1		South Africa	Africa
A. africanus	Type 2	457	Holloway et al., 2004	2.1		South Africa	Africa
A. robustus	DNH 155	450	Martin et al., 2020	2		South Africa	Africa
A. sediba	MH 1	420	Berger et al., 2010	1.977		South Africa	Africa
H. habilis	KNM-ER 1805	582	Holloway et al., 2004	1.89		Kenya	Africa
H. habilis	KNM-ER 1813	509	Holloway et al., 2004	1.89		Kenya	Africa
H. habilis	OH 24	597	Tobias, 1991	1.88		Tanzania	Africa
H. rudolfensis	KNM-ER 1470	752	Holloway et al., 2004	1.88		Kenya	Africa
H. rudolfensis	KNM-ER 3732	750	Holloway et al., 2004	1.88		Kenya	Africa
A. boisei	KNM-ER 23000	491	Brown et al., 1993	1.87		Kenya	Africa
A. boisei	KNM-WT 13750	475	Holloway et al., 2004	1.87		Kenya	Africa
A. boisei	KNM-ER 407	510	Holloway et al., 2004	1.85		Kenya	Africa
H. rudolfensis	KNM-ER 1590	825	Holloway et al., 2004	1.85		Kenya	Africa
A. boisei	OH 5	523	Holloway et al., 2004	1.82		Tanzania	Africa
H. habilis	OH 7	777	Tobias, 1991	1.8		Tanzania	Africa
A. boisei	KNM-WT 17400	400	Holloway et al., 2004	1.77		Kenya	Africa
H. erectus	D2280	775	Rightmire et al., 2006	1.77	Rightmire et al., 2006	Georgia	Eurasia
H. erectus	D2282	655	Rightmire et al., 2006	1.77	Rightmire et al., 2006	Georgia	Eurasia
H. erectus	D2700	600	Rightmire et al., 2006	1.77	Rightmire et al., 2006	Georgia	Eurasia
H. erectus	D3444	650	Lordkipanidze et al., 2006	1.77	Lordkipanidze et al., 2006	Georgia	Eurasia
H. erectus	D5000	546	Lordkipanidze et al., 2013	1.77		Georgia	Eurasia
A. robustus	Drimolen	530	Schwartz & Tattersall	1.75		South Africa	Africa
H. habilis	OH 16	638	Tobias, 1991	1.67		Tanzania	Africa
A. robustus	SK 1585	530	Holloway et al., 2004	1.65		South Africa	Africa
H. erectus	Gongwang 1	780	Holloway et al., 2004	1.63	Zhu et al., 2015	China	Asia
H. erectus	KNM-ER 3733	848	Holloway, 1981	1.63	Feibel et al., 1989	Kenya	Africa
H. erectus	Sangiran 4	908	Holloway et al., 2004	1.62	Indriati and Anton, 2010	Indonesia	Asia
H. habilis	OH 13	673	Tobias, 1991	1.6		Tanzania	Africa
A. boisei	KNM-ER 406	500	Holloway et al., 2004	1.58		Kenya	Africa
A. boisei	KNM-ER 732	500	Holloway et al., 2004	1.58		Kenya	Africa
H. erectus	KNM-ER 3883	804	Holloway et al., 2004	1.57	Feibel et al., 1989	Kenya	Africa
H. erectus	DAN5	598	Semaw et al., 2020	1.55	Semaw et al., 2020	Ethiopia	Africa
H. erectus	KNM-ER 42700	691	Spoor et al., 2007	1.55	Spoor et al., 2007	Kenya	Africa
H. erectus	Sangiran 38	850	Indriati and Anton, 2010	1.52	Indriati and Anton, 2010	Indonesia	Asia
H. erectus	KNM-WT 15000	880	Begun & Walker, 1993	1.49		Kenya	Africa
A. boisei	Konso	545	Holloway et al., 2004	1.42		Ethiopia	Africa
H. erectus	Sangiran 10	855	Holloway et al., 2004	1.29	Larick et al., 2001	Indonesia	Asia
H. erectus	Sangiran 12	1059	Holloway et al., 2004	1.29	Larick et al., 2001	Indonesia	Asia
H. erectus	Sangiran 17	1004	Holloway, 1981	1.29	Larick et al., 2001	Indonesia	Asia
H. erectus	Sangiran 2	813	Holloway, 1981	1.29	Larick et al., 2001	Indonesia	Asia
H. erectus	BSN12/P1	850	Semaw et al., 2020	1.26	Semaw et al., 2020	Ethiopia	Africa
H. erectus	Bukaran (SBK-1996.02)	916	Grimaud-Herve et al., 2012	1.25	Larick et al., 2001	Indonesia	Asia
H. erectus	Grogol-Wetan (Gwn-1993.09)	850	Grimaud-Herve, pers comm	1.25	Larick et al., 2001	Indonesia	Asia
H. erectus	OH 9	1067	Holloway et al., 2004	1.25		Tanzania	Africa
H. erectus	Sangiran IX	870	Kaifu et al., 2011	1.25	Larick et al., 2001	Indonesia	Asia
H. erectus	Buia	900	Macciarelli et al., 2004	1	Abbate et al., 1998	Eritrea	Africa
H. erectus	Daka	986	Gilbert and Asfaw, 2008	1	Asfaw et al., 2002	Ethiopia	Africa
H. erectus	Yunxian	1050	Vialet et al., 2010	0.936	de Lumley et al., 2008	China	Asia
H. erectus	Sangiran 3	950	Holloway et al., 2004	0.9	Larick et al., 2001	Indonesia	Asia
H. erectus	Trinil 2	940	Holloway, 1981	0.9	Anton, 2003	Indonesia	Asia
H. heidelbergensis	Ceprano	1150	Bruner and Manzi, 2005	0.85	Bruner and Manzi, 2005	Italy	Europe
H. erectus	Zhoukodian Z-11	1015	Weidenreich, 1943	0.73		China	Asia
H. erectus	Zhoukodian Z-2	1030	Weidenreich, 1943	0.73		China	Asia
H. erectus	Zhoukodian Z10	1225	Weidenreich, 1943	0.73		China	Asia
H. erectus	Zhoukodian Z12	1030	Weidenreich, 1943	0.73		China	Asia
H. erectus	ZKD III	915	Weidenreich, 1943	0.73		China	Asia
H. erectus	OH 12	727	Holloway et al., 2004	0.7		Tanzania	Africa
H. erectus	Nanjing	876	Liu et al., 2005	0.6	Wu et al., 2011	China	Asia
H. heidelbergensis	Bodo	1250	Conroy et al., 2000	0.6		Ethiopia	Africa
H. erectus	Sambungmacan 1	1035	Baba et al., 2003	Date uncertain	.055 in Yokoyama et al., 2009	Indonesia	Asia
H. erectus	Sambungmacan 4	1006	Baba et al., 2003	Date uncertain	.055 in Yokoyama et al., 2009	Indonesia	Asia
H. erectus	Sambungmacan 3	917	Broadfield et al., 2001	Date uncertain	.055 in Yokoyama et al., 2009	Indonesia	Asia
H. erectus	Ngawi	870	Holloway et al., 2004	0.5		Indonesia	Asia
H. heidelbergensis	Saldanha	1225	Tobias, 1971	0.5		South Africa	Africa
H. erectus	ZKD V	1140	Wu et al., 2010	0.45	Shen et al., 2009	China	Asia
H. heidelbergensis	Arago	1166	Holloway et al., 2004	0.45		France	Europe
H. heidelbergensis	Atapuerca 10	1218	Arsuaga et al., 2014	0.43		Iberia	Europe
H. heidelbergensis	Atapuerca 12	1228	Arsuaga et al., 2014	0.43		Iberia	Europe
H. heidelbergensis	Atapuerca 13	1437	Arsuaga et al., 2014	0.43		Iberia	Europe
H. heidelbergensis	Atapuerca 15	1284	Arsuaga et al., 2014	0.43		Iberia	Europe
H. heidelbergensis	Atapuerca 16	1236	Arsuaga et al., 2014	0.43		Iberia	Europe
H. heidelbergensis	Atapuerca 17	1219	Arsuaga et al., 2014	0.43		Iberia	Europe
H. heidelbergensis	Atapuerca 2	1334	Arsuaga et al., 2014	0.43		Iberia	Europe
H. heidelbergensis	Atapuerca 4	1360	Arsuaga et al., 2014	0.43		Iberia	Europe
H. heidelbergensis	Atapuerca 5	1092	Arsuaga et al., 2014	0.43		Iberia	Europe
H. heidelbergensis	Atapuerca 7	1144	Arsuaga et al., 2014	0.43		Iberia	Europe
H. erectus	Hexian	1025	Wu & Dong, 1982	0.412	Grun et al., 1998	China	Asia
H. heidelbergensis	Ndutu	1100	Holloway in Rightmire, 1983	0.4		Tanzania	Africa
H. heidelbergensis	Swanscombe	1325	Holloway et al., 2004	0.3		England	Europe
H. sapiens	Jebel Irhoud 1	1305	Holloway et al., 2004	0.3		Morocco	Africa
H. sapiens	Jebel Irhoud 2	1400	Holloway et al., 2004	0.3		Morocco	Africa
H. heidelbergensis	Kabwe	1325	Holloway et al., 2004	0.299		Zambia	Africa
H. naledi	DH1/DH2	560	Garvin et al., 2017	0.286		South Africa	Africa
H. naledi	DH3/DH4	465	Garvin et al., 2017	0.286		South Africa	Africa
H. naledi	LES 1	610	Hawks et al., 2017	0.286		South Africa	Africa
H. heidelbergensis	Jinniushan	1390	Holloway et al., 2004	0.28		China	Asia
H. heidelbergensis	Guomde	1400	Holloway et al., 2004	0.272	Brauer et al., 1997	Kenya	Africa
H. neanderthalensis	Apidima 2	1454	Harvarti et al., 2011	0.252	Harvarti et al., 2011	Greece	Europe
H. neanderthalensis	Saccopastore 1	1174	Bruner and Manzi, 2008	0.25		Italy	Europe
H. neanderthalensis	Saccopastore 2	1300	Holloway et al., 2004	0.25		Italy	Europe
H. heidelbergensis	Sale	880	Holloway et al., 2004	0.24		Morocco	Africa
H. heidelbergensis	Narmada	1260	Holloway et al., 2004	0.236		India	Asia
H. sapiens	Omo 2 (Kibbish)	1435	Holloway et al., 2004	0.233	Vidal et al., 2022	Ethiopia	Africa
H. heidelbergensis	Ehringsdorf	1450	Holloway et al., 2004	0.23		Germany	Europe
H. heidelbergensis	Eliye Springs (KNM-ER 11693)	1212	Brauer et al., 1997	0.225		Kenya	Africa
H. heidelbergensis	Steinheim	1140	Prossinger et al., 2003	0.225	Adam, 1985	Germany	Europe
H. heidelbergensis	Petralona	1230	Holloway et al., 2004	0.21		Greece	Europe
H. heidelbergensis	Dali	1120	Holloway et al., 2004	0.209		China	Asia
H. neanderthalensis	Reilingen	1430	Holloway et al., 2004	0.2		Germany	Europe
H. neanderthalensis	Biache	1200	Holloway et al., 2004	0.175		France	Europe
H. neanderthalensis	Fontechevade II	1350	Holloway et al., 2004	0.16		France	Europe
H. sapiens	Herto	1450	Holloway et al., 2004	0.16		Ethiopia	Africa
H. neanderthalensis	La Chaise	1065	Holloway et al., 2004	0.15		France	Europe
H. longi	Harbin	1420	Ji et al., 2021	0.148		China	Asia
H. sapiens	Singa 1	1550	Holloway et al., 2004	0.133		Sudan	Africa
H. neanderthalensis	Krapina 2	1450	Holloway et al., 2004	0.13		Croatia	Europe
H. neanderthalensis	Krapina 3	1255	Holloway et al., 2004	0.13		Croatia	Europe
H. neanderthalensis	Krapina 5	1535	Caspari & Radovcic, 2006	0.13		Croatia	Europe
H. neanderthalensis	Krapina 6 (Cranium E)	1205	Holloway et al., 2004	0.13		Croatia	Europe
H. neanderthalensis	Lazaret	1250	Holloway et al., 2004	0.13		France	Europe
H. sapiens	Skhul 1	1450	Holloway et al., 2004	0.13		Israel	Middle East
H. sapiens	Skhul 4	1554	Holloway et al., 2004	0.13		Israel	Middle East
H. sapiens	Skhul 5	1520	Holloway et al., 2004	0.13		Israel	Middle East
H. sapiens	Skhul 9	1590	Holloway et al., 2004	0.13		Israel	Middle East
H. sapiens	Yingkou	1390	Holloway et al., 2004	0.13		China	Asia
H. sapiens	Laetoli 18	1367	Holloway et al., 2004	0.12		Tanzania	Africa
H. erectus	Xuchang 1	1800	Li et al., 2017	0.115		China	Asia
H. erectus	Ngandong (Solo 9)	1135	Holloway et al., 2004	0.11		Indonesia	Asia
H. erectus	Ngandong 1	1172	Holloway et al., 2004	0.11		Indonesia	Asia
H. erectus	Ngandong 13	1231	Holloway et al., 2004	0.11		Indonesia	Asia
H. erectus	Ngandong 14	1090	Holloway et al., 2004	0.11		Indonesia	Asia
H. erectus	Ngandong 6	1251	Holloway et al., 2004	0.11		Indonesia	Asia
H. erectus	Ngandong 7	1028	Balzeau et al., 2003	0.11		Indonesia	Asia
H. neanderthalensis	Tabun 1	1271	Holloway et al., 2004	0.11		Israel	Middle East
H. sapiens	Qafzeh 11	1280	Holloway et al., 2004	0.11		Israel	Middle East
H. sapiens	Qafzeh 6	1568	Holloway et al., 2004	0.11		Israel	Middle East
H. sapiens	Qafzeh 9	1531	Holloway et al., 2004	0.11		Israel	Middle East
H. neanderthalensis	Ganovce	1320	Holloway et al., 2004	0.09		Slovakia	Europe
H. sapiens	Border Cave	1522	Hughes, 1990	0.09		South Africa	Africa
H. neanderthalensis	La Ferrassie	1640	Holloway et al., 2004	0.07		France	Europe
H. neanderthalensis	Spy 1	1305	Holloway et al., 2004	0.068		Belgium	Europe
H. neanderthalensis	Spy 2	1553	Holloway et al., 2004	0.068		Belgium	Europe
H. sapiens	Liujiang	1567	Wu et al., 2008	0.067	Wu and Poirier, 1995	China	Asia
H. neanderthalensis	La Quina 5	1172	Holloway et al., 2004	0.065		France	Europe
H. floresiensis	LB1	419	Falk	0.06		Indonesia	Asia
H. neanderthalensis	Shanidar 1	1600	Holloway et al., 2004	0.06		Iraq	Middle East
H. neanderthalensis	Shanidar 5	1550	Holloway et al., 2004	0.06		Iraq	Middle East
H. sapiens	Manot Cave	1100	Hershkovitz et al., 2015	0.0547		Israel	Middle East
H. neanderthalensis	Mt. Circeo	1360	Holloway et al., 2004	0.052		Italy	Europe
H. neanderthalensis	Gibraltar	1200	Holloway et al., 2004	0.05		Iberia	Europe
H. neanderthalensis	La Chapelle	1625	Holloway et al., 2004	0.05		France	Europe
H. sapiens	Ryonggok 3	1650	Bae et al., 2010	0.047	Keates, 2010	North Korea	Asia
H. sapiens	Ryonggok 7	1450	Bae et al., 2010	0.047	Keates, 2010	North Korea	Asia
H. neanderthalensis	Amud	1740	Holloway et al., 2004	0.041		Israel	Middle East
H. neanderthalensis	Le Moustier	1565	Holloway et al., 2004	0.041		France	Europe
H. neanderthalensis	Neandertal	1525	Holloway et al., 2004	0.04		Germany	Europe
H. sapiens	Nazlet Khater 2	1420	Holloway et al., 2004	0.0376	Holt	Egypt	Africa
H. sapiens	Hofmeyr	1580	Grine et al., 2010	0.036	Grine et al., 2007	South Africa	Africa
H. sapiens	Chatelperron (les Fees)	1425	Ivanhoe, 2010	0.033	Ivanhoe, 2010	France	Europe
H. sapiens	Wadjak 1	1464	Coon, 1962	0.033	Storm et al., 2013	Indonesia	Asia
H. sapiens	Wadjak 2	1650	many sources in Henn	0.033	Storm et al., 2013	Indonesia	Asia
H. sapiens	Mladec 5	1650	Holloway et al., 2004	0.032		Czech Republic	Europe
H. sapiens	Jingchuan	1524	HaiJun et al., 2010	0.0315	HaiJun et al., 2010	China	Asia
H. sapiens	Mladec 2	1390	Holloway et al., 2004	0.0313	Holt	Czech Republic	Europe
H. sapiens	Mladec 1	1540	Holloway et al., 2004	0.0312	Holt	Czech Republic	Europe
H. sapiens	Ziyang	1210	Phenice & Sauer, 1977	0.03	Wu and Poirier, 1995	China	Asia
H. sapiens	Zhoukoudian (Upper Cave) 1	1500	Holloway et al., 2004	0.029	Holt	China	Asia
H. sapiens	Zhoukoudian (Upper Cave) 2	1380	Holloway et al., 2004	0.029	Holt	China	Asia
H. sapiens	Zhoukoudian (Upper Cave) 3	1290	Holloway et al., 2004	0.029	Holt	China	Asia
H. sapiens	Cioclovina	1499	Kranioti et al., 2011	0.0285	Holt	Romania	Europe
H. sapiens	Combe Capelle	1570	Holloway et al., 2004	0.028		France	Europe
H. sapiens	Cro-Magnon 1	1730	Holloway et al., 2004	0.0277	Holt	France	Europe
H. sapiens	Cro-Magnon 2	1402	Helmuth, 1999	0.0277	Holt	France	Europe
H. sapiens	Cro-Magnon 3	1590	Holloway et al., 2004	0.0277	Holt	France	Europe
H. sapiens	Grotte des Infants 4	1775	Holloway et al., 2004	0.0275		Italy	Europe
H. sapiens	Grotte des Infants 5	1375	Holloway et al., 2004	0.0275		Italy	Europe
H. sapiens	Grotte des Infants 6	1580	Holloway et al., 2004	0.0275		Italy	Europe
H. sapiens	Sungir 1	1464	Holloway et al., 2004	0.0271	Dobrovolskeya et al., 2012	Russia	Eurasia
H. sapiens	Dolni Vestonice 13	1481	Franciscus & Vlcek, 2006	0.0266	Holt	Czech Republic	Europe
H. sapiens	Dolni Vestonice 14	1538	Franciscus & Vlcek, 2006	0.0266	Holt	Czech Republic	Europe
H. sapiens	Dolni Vestonice 15	1378	Franciscus & Vlcek, 2006	0.0266	Holt	Czech Republic	Europe
H. sapiens	Brno I	1600	Holloway et al., 2004	0.026		Czech Republic	Europe
H. sapiens	Brno III	1304	Holloway et al., 2004	0.026		Czech Republic	Europe
H. sapiens	Dolni Vestonice 3	1285	Franciscus & Vlcek, 2006	0.026	Holt	Czech Republic	Europe
H. sapiens	Pavlov 1	1472	Franciscus & Vlcek, 2006	0.026	Holt	Czech Republic	Europe
H. sapiens	Predmosti 10	1452	Holloway et al., 2004	0.026		Czech Republic	Europe
H. sapiens	Predmosti 3	1580	Holloway et al., 2004	0.026		Czech Republic	Europe
H. sapiens	Predmosti 4	1250	Holloway et al., 2004	0.026		Czech Republic	Europe
H. sapiens	Predmosti 9	1555	Holloway et al., 2004	0.026		Czech Republic	Europe
H. sapiens	Sungir 3	1361	Holloway et al., 2004	0.026	Dobrovolskeya et al., 2012	Russia	Eurasia
H. sapiens	WLH 50	1540	Kubo and Kono, 2011	0.026	Grun et al., 2011	Aboriginal	Australia
H. sapiens	Dolni Vestonice 16	1547	Franciscus & Vlcek, 2006	0.0256	Holt	Czech Republic	Europe
H. sapiens	Barma Grande II	1748	Parenti, 1973	0.0248	Holt	Italy	Europe
H. sapiens	Sungir 5	1453	Holloway et al., 2004	0.024		Russia	Eurasia
H. sapiens	Veyrier 1	1430	Holloway et al., 2004	0.024		France	Europe
H. sapiens	Kostenki 2	1605	Holloway et al., 2004	0.0238		Russia	Eurasia
H. sapiens	Sungir 2	1267	Holloway et al., 2004	0.0238	Holt	Russia	Eurasia
H. sapiens	Brno II	1500	Holloway et al., 2004	0.0237	Holt	Czech Republic	Europe
H. sapiens	Arene Candide 1-IP	1490	Ruff et al., 1997	0.0234	Holt	Italy	Europe
H. sapiens	Kostenki 14	1222	Holloway et al., 2004	0.0228		Russia	Eurasia
H. sapiens	Mollet III	1521	Soler et al., 2013	0.02233	Soler et al., 2013	Iberia	Europe
H. sapiens	Abri Pataud 1	1380	Holloway et al., 2004	0.022	Holt	France	Europe
H. sapiens	Roc de Sers	1380	Ivanhoe, 2010	0.01923	Straus, 1986	France	Europe
H. sapiens	Roc de Sers	1485	Ivanhoe, 2010	0.01923	Straus, 1986	France	Europe
H. sapiens	Cohuna	1447	Brown, website	0.019	"Contemporary with Kow Swamp" Wood	Aboriginal	Australia
H. sapiens	Minatogawa 1	1335	Kubo & Kono, 2011	0.0183	Holt	Japan	Asia
H. sapiens	Minatogawa 2	1170	Holloway et al., 2004	0.0183	Holt	Japan	Asia
H. sapiens	Minatogawa 4	1170	Kubo & Kono, 2011	0.0183	Holt	Japan	Asia
H. sapiens	Le Placard	1300	Ivanhoe, 2010	0.018	Ivanhoe, 2010	France	Europe
H. sapiens	Rond-du-Barry 8	1515	Ivanhoe, 2010	0.0171	Holt	France	Europe
H. sapiens	Taforalt, Algeria	1279	Ferembach, 1965	0.0168	Holt	Algeria	Africa
H. sapiens	Taforalt, Algeria	1360	Ferembach, 1965	0.0168	Holt	Algeria	Africa
H. sapiens	Taforalt, Algeria	1385	Ferembach, 1965	0.0168	Holt	Algeria	Africa
H. sapiens	Taforalt, Algeria	1390	Ferembach, 1965	0.0168	Holt	Algeria	Africa
H. sapiens	Taforalt, Algeria	1435	Ferembach, 1965	0.0168	Holt	Algeria	Africa
H. sapiens	Taforalt, Algeria	1478	Ferembach, 1965	0.0168	Holt	Algeria	Africa
H. sapiens	Taforalt, Algeria	1585	Ferembach, 1965	0.0168	Holt	Algeria	Africa
H. sapiens	Taforalt, Algeria	1622	Ferembach, 1965	0.0168	Holt	Algeria	Africa
H. sapiens	Taforalt, Algeria	1623	Ferembach, 1965	0.0168	Holt	Algeria	Africa
H. sapiens	Taforalt, Algeria	1645	Ferembach, 1965	0.0168	Holt	Algeria	Africa
H. sapiens	Taforalt, Algeria	1660	Ferembach, 1965	0.0168	Holt	Algeria	Africa
H. sapiens	Taforalt, Algeria	1660	Ferembach, 1965	0.0168	Holt	Algeria	Africa
H. sapiens	Taforalt, Algeria	1675	Ferembach, 1965	0.0168	Holt	Algeria	Africa
H. sapiens	Taforalt, Algeria	1685	Ferembach, 1965	0.0168	Holt	Algeria	Africa
H. sapiens	Taforalt, Algeria	1686	Ferembach, 1965	0.0168	Holt	Algeria	Africa
H. sapiens	Taforalt, Algeria	1689	Ferembach, 1965	0.0168	Holt	Algeria	Africa
H. sapiens	Taforalt, Algeria	1700	Ferembach, 1965	0.0168	Holt	Algeria	Africa
H. sapiens	Taforalt, Algeria	1738	Ferembach, 1965	0.0168	Holt	Algeria	Africa
H. sapiens	Taza, Algeria	1125	Meier et al., 2003	0.016	Meier et al., 2003	Algeria	Africa
H. sapiens	St. Germain-la-Riviere	1354	Movius, 1975	0.0158	Holt	France	Europe
H. sapiens	Bruniquel 2	1555	Movius, 1975	0.0153	Holt	France	Europe
H. sapiens	Chancelade	1530	Holloway et al., 2004	0.0153	Holt	France	Europe
H. sapiens	Cap Blanc 1	1434	Movius, 1975	0.015	Holt	France	Europe
H. sapiens	Coobool Creek	1117	Brown, website	0.014	Brown	Aboriginal	Australia
H. sapiens	Coobool Creek	1225	Brown, website	0.014	Brown	Aboriginal	Australia
H. sapiens	Coobool Creek	1256	Brown, website	0.014	Brown	Aboriginal	Australia
H. sapiens	Coobool Creek	1278	Brown, website	0.014	Brown	Aboriginal	Australia
H. sapiens	Coobool Creek	1281	Brown, website	0.014	Brown	Aboriginal	Australia
H. sapiens	Coobool Creek	1302	Brown, website	0.014	Brown	Aboriginal	Australia
H. sapiens	Coobool Creek	1305	Brown, website	0.014	Brown	Aboriginal	Australia
H. sapiens	Coobool Creek	1324	Brown, website	0.014	Brown	Aboriginal	Australia
H. sapiens	Coobool Creek	1324	Brown, website	0.014	Brown	Aboriginal	Australia
H. sapiens	Coobool Creek	1371	Brown, website	0.014	Brown	Aboriginal	Australia
H. sapiens	Coobool Creek	1387	Brown, website	0.014	Brown	Aboriginal	Australia
H. sapiens	Coobool Creek	1397	Brown, website	0.014	Brown	Aboriginal	Australia
H. sapiens	Coobool Creek	1413	Brown, website	0.014	Brown	Aboriginal	Australia
H. sapiens	Coobool Creek	1437	Brown, website	0.014	Brown	Aboriginal	Australia
H. sapiens	Coobool Creek	1441	Brown, website	0.014	Brown	Aboriginal	Australia
H. sapiens	Coobool Creek	1444	Brown, website	0.014	Brown	Aboriginal	Australia
H. sapiens	Coobool Creek	1444	Brown, website	0.014	Brown	Aboriginal	Australia
H. sapiens	Coobool Creek	1463	Brown, website	0.014	Brown	Aboriginal	Australia
H. sapiens	Coobool Creek	1470	Brown, website	0.014	Brown	Aboriginal	Australia
H. sapiens	Coobool Creek	1483	Brown, website	0.014	Brown	Aboriginal	Australia
H. sapiens	Coobool Creek	1502	Brown, website	0.014	Brown	Aboriginal	Australia
H. sapiens	Coobool Creek	1511	Brown, website	0.014	Brown	Aboriginal	Australia
H. sapiens	Coobool Creek	1538	Brown, website	0.014	Brown	Aboriginal	Australia
H. sapiens	Coobool Creek	1541	Brown, website	0.014	Brown	Aboriginal	Australia
H. sapiens	Mas d'Azil	1275	Movius, 1975	0.014	Ivanhoe, 2010	France	Europa
H. sapiens	San Teodoro 1	1565	Holloway et al., 2004	0.014	D'Amore et al., 2009	Italy	Europe
H. sapiens	San Teodoro 2	1569	Holloway et al., 2004	0.014	D'Amore et al., 2009	Italy	Europe
H. sapiens	San Teodoro 3	1560	Holloway et al., 2004	0.014	D'Amore et al., 2009	Italy	Europe
H. sapiens	San Teodoro 5	1484	Holloway et al., 2004	0.014	D'Amore et al., 2009	Italy	Europe
H. sapiens	MLDG, China	1327	Curnoe et al., 2012	0.0139	Curnoe et al., 2012	China	Asia
H. sapiens	Les Hoteaux	1403	Ivanhoe, 2010	0.013	Ivanhoe, 2010	France	Europe
H. sapiens	Ortucchio 1	1302	Ivanhoe, 2010	0.0126	Holt	Italy	Europe
H. sapiens	Oberkassel 2	1370	Movius, 1975	0.0122	Holt	Germany	Europe
H. sapiens	Keilor	1497	Brown, website	0.012	Brown et al., 2010	Aboriginal	Australia
H. sapiens	Laugerie-Basse	1505	Ivanhoe, 2010	0.012	Ivanhoe, 2010	France	Europe
H. sapiens	Arene Candide 1	1414	Ruff et al., 1997	0.0118	Wood	Italy	Europe
H. sapiens	Arene Candide 2	1424	Ruff et al., 1997	0.0118	Wood	Italy	Europe
H. sapiens	Arene Candide 4	1520	Ruff et al., 1997	0.0118	Wood	Italy	Europe
H. sapiens	Arene Candide 5	1661	Ruff et al., 1997	0.0118	Wood	Italy	Europe
H. sapiens	Le Bichon 1	1465	Ivanhoe, 2010	0.0117	Holt	Switzerland	Europe
H. sapiens	Oberkassel 1	1500	Holloway et al., 2004	0.0116	Holt	Germany	Europe
H. sapiens	Afalou, Algeria	1154	Vallois, 1952	0.0115	Holt	Algeria	Africa
H. sapiens	Afalou, Algeria	1249	Vallois, 1952	0.0115	Holt	Algeria	Africa
H. sapiens	Afalou, Algeria	1266	Vallois, 1952	0.0115	Holt	Algeria	Africa
H. sapiens	Afalou, Algeria	1291	Vallois, 1952	0.0115	Holt	Algeria	Africa
H. sapiens	Afalou, Algeria	1316	Vallois, 1952	0.0115	Holt	Algeria	Africa
H. sapiens	Afalou, Algeria	1475	Vallois, 1952	0.0115	Holt	Algeria	Africa
H. sapiens	Afalou, Algeria	1486	Vallois, 1952	0.0115	Holt	Algeria	Africa
H. sapiens	Afalou, Algeria	1519	Vallois, 1952	0.0115	Holt	Algeria	Africa
H. sapiens	Afalou, Algeria	1520	Vallois, 1952	0.0115	Holt	Algeria	Africa
H. sapiens	Afalou, Algeria	1530	Vallois, 1952	0.0115	Holt	Algeria	Africa
H. sapiens	Afalou, Algeria	1536	Vallois, 1952	0.0115	Holt	Algeria	Africa
H. sapiens	Afalou, Algeria	1577	Vallois, 1952	0.0115	Holt	Algeria	Africa
H. sapiens	Afalou, Algeria	1581	Vallois, 1952	0.0115	Holt	Algeria	Africa
H. sapiens	Afalou, Algeria	1584	Vallois, 1952	0.0115	Holt	Algeria	Africa
H. sapiens	Afalou, Algeria	1597	Vallois, 1952	0.0115	Holt	Algeria	Africa
H. sapiens	Afalou, Algeria	1604	Vallois, 1952	0.0115	Holt	Algeria	Africa
H. sapiens	Afalou, Algeria	1630	Vallois, 1952	0.0115	Holt	Algeria	Africa
H. sapiens	Afalou, Algeria	1630	Vallois, 1952	0.0115	Holt	Algeria	Africa
H. sapiens	Afalou, Algeria	1672	Vallois, 1952	0.0115	Holt	Algeria	Africa
H. sapiens	Afalou, Algeria	1672	Vallois, 1952	0.0115	Holt	Algeria	Africa
H. sapiens	Afalou, Algeria	1697	Vallois, 1952	0.0115	Holt	Algeria	Africa
H. sapiens	Afalou, Algeria	1700	Vallois, 1952	0.0115	Holt	Algeria	Africa
H. sapiens	Afalou, Algeria	1713	Vallois, 1952	0.0115	Holt	Algeria	Africa
H. sapiens	Afalou, Algeria	1716	Vallois, 1952	0.0115	Holt	Algeria	Africa
H. sapiens	Afalou, Algeria	1774	Vallois, 1952	0.0115	Holt	Algeria	Africa
H. sapiens	Nacurrie	1597	Brown, website	0.0114	Brown et al., 2010	Aboriginal	Australia
H. sapiens	Moča	1277.3	Sefcakova et al., 2011	0.0113	Sefcakova et al., 2011	Slovakia	Europe
H. sapiens	Cheix	1470	Ivanhoe, 2010	0.011	Ivanhoe, 2010	France	Europe
H. sapiens	Duruthy	1140	Movius, 1975	0.011	Ivanhoe, 2010	France	Europe
H. sapiens	Tuinplaas	1589	Hughes, 1990	0.011	Dusseldorp et al., 2013	South Africa	Africa
H. sapiens	Naivasha	1453	Tobias, 1971	0.01085	Protsch, 1976	Kenya	Africa
H. sapiens	Aveline's Hole, Somerset	1450	Palmer, 1959	0.0103	Miles, 2003	England	Europe
H. sapiens	Boskop	1650	Tobias, 1971	0.01	?	South Africa	Africa
H. sapiens	Mai Da Nuoc	1429.7	Cuong, 1987	0.01	Cuong, 1987	Vietnam	Asia
H. sapiens	Tepaxpan	1540	Phenice & Sauer, 1977	0.01	Phenice & Sauer, 1977	Mexico Indigenous	North America
H. sapiens	Hotu 2	1404	Angel, 1952	0.0093	Coon, 1957	Iran	Middle East
H. sapiens	Hotu 3	1440	Angel, 1952	0.0093	Coon, 1957	Iran	Middle East
H. sapiens	Culoz I	1535	Ferembach 1974b	0.009	Evin et al 1971	France	Europe
H. sapiens	Culoz II	1644	Ferembach 1974b	0.009	Evin et al 1971	France	Europe
H. sapiens	M4300, Bass Strait	1265	Murray et al., 1982	0.009	Murray et al., 1982	Tasmania	Australia
H. sapiens	Gamble's Cave 4	1470	Tobias, 1971	0.0082	efossils	Kenya	Africa
H. sapiens	Gamble's Cave 5	1530	Tobias, 1971; Leakey, 1935	0.0082	efossils	Kenya	Africa
H. sapiens	Gramat	1861	Ferembach 1974b	0.008	Gruber et al., 2009	France	Europe
H. sapiens	Mai Da Dieu	1271	Cuong, 1986	0.008	Matsumura	Vietnam	Asia
H. sapiens	Teviec 16	1428	Balzeau, PC	0.008	Gruber et al., 2009	France	Europe
H. sapiens	Teviec 8	1430	Balzeau, PC	0.008	Gruber et al., 2009	France	Europe
H. sapiens	Teviec 9	1420	Balzeau, PC	0.008	Gruber et al., 2009	France	Europe
H. sapiens	Rastel	1682	Ferembach 1974b	0.0075	Rozoy, 1978	France	Europe
H. sapiens	Song Terus	1570	Balzeau, PC	0.0075	Balzeau, 2013	Indonesia	Asia
H. sapiens	Fish Hoek 1	1600	Drennen, 1929	0.0072	Stynder et al., 2009	South Africa	Africa
H. sapiens	Oakhurst 2	1410	Drennan, 1937	0.00712	Patrick, 1989 thesis	South Africa	Africa
H. sapiens	Haverty 5, CA	1380	Brooks et al., 1990	0.007	Brooks et al., 1990	Indigenous NA	North America
H. sapiens	Haverty 7, CA	1310	Brooks et al., 1990	0.007	Brooks et al., 1990	Indigenous NA	North America
H. sapiens	Lake Nitchie	1510	Brown, website	0.007	Bulbeck & O'Connor, 2011	Aboriginal	Australia
H. sapiens	Montclus	1687	Ferembach 1974b	0.007	Schute Im Walde et al 1986	France	Europe
H. sapiens	Plettenberg Bay	1350	this study	0.007	Sealy, 2010	South Africa	Africa
H. sapiens	Punin	1275	Phenice & Sauer, 1977	0.007	Brothwell & Burleigh, 1980	Ecuador Indigenous	South America
H. sapiens	Oakhurst 1	1403	Drennan, 1937	0.00618	Patrick, 1989 thesis	South Africa	Africa
H. sapiens	Oakhurst 3	1195	Drennan, 1937	0.00599	Patrick, 1989 thesis	South Africa	Africa
H. sapiens	Oakhurst 15	1214	Drennan, 1937	0.0057	Patrick, 1989 thesis	South Africa	Africa
H. sapiens	Columnata, Algeria	1351	Chamla, 1970	0.0055	Chamla, 1980	Algeria	Africa
H. sapiens	Columnata, Algeria	1426	Chamla, 1970	0.0055	Chamla, 1980	Algeria	Africa
H. sapiens	Columnata, Algeria	1498	Chamla, 1970	0.0055	Chamla, 1980	Algeria	Africa
H. sapiens	Lansing	1537.5	Hrdlicka, 1903	0.0055	Bass, 1973	Indigenous NA	North America
H. sapiens	Oakhurst 8b	1247	Drennan, 1937	0.00545	Patrick, 1989 thesis	South Africa	Africa
H. sapiens	Oakhurst 13	1290	Drennan, 1937	0.00533	Patrick, 1989 thesis	South Africa	Africa
H. sapiens	Asselar	1520	Tobias, 1971	0.005	Phenice & Sauer, 1977	Mali	Africa
H. sapiens	Hutton, Somerset	1415	Palmer, 1959	0.005	Palmer, 1959	England	Europe
H. sapiens	Oakhurst 5	1389	Drennan, 1937	0.0041	Patrick, 1989 thesis	South Africa	Africa
H. sapiens	Urtiaga A	1510	Ferembach 1974b	0.0035	Altua & de la Rua, 1989	Spain	Europe
H. sapiens	Urtiaga B	1579	Ferembach 1974b	0.0035	Altua & de la Rua, 1989	Spain	Europe
H. sapiens	Sauveterre	1769	Ferembach 1974b	0.0034	Smith, 1984	France	Europe
H. sapiens	Byneskranskop II	1270	this study	0.00319	Henneberg	South Africa	Africa
H. sapiens	Byneskranskop I	1270	this study	0.00312	Henneberg	South Africa	Africa
H. sapiens	Danes' Graves 1	1325	Wright, 1903	0.00225	Wright, 1903	England	Europe
H. sapiens	Danes' Graves 7	1325	Wright, 1903	0.00225	Wright, 1903	England	Europe
H. sapiens	Elmenteita B	1585	Hughes, 1990	0.002	Hennenberg	Kenya	Africa
H. sapiens	Glastonbury, Somerset	1468	Palmer, 1959	0.002	Palmer, 1959	England	Europe
H. sapiens	Langwith, Derbyshire	1250	Gladstone, 1921	0.002	Chamberlain, 2007	England	Europe
H. sapiens	Loulan	1265	Keith, 1929	0.00175	Keith, 1929	China	Asia
H. sapiens	Loulan LT 03	1230	Keith, 1929	0.00175	Keith, 1929	China	Asia
H. sapiens	Niya	1140	Keith, 1929	0.0017	Keith, 1929	China	Asia
H. sapiens	Broederstroom	1232	De Villiers via Henneberg	0.00133	Henneberg	South Africa	Africa
H. sapiens	Kafue I	1436	Gabel, 1962	0.00133	Gabel, 1962	Zambia	Africa
H. sapiens	Kafue II	1559	Gabel, 1962	0.00133	Gabel, 1962	Zambia	Africa
H. sapiens	Kafue III	1340	Gabel, 1962	0.00133	Gabel, 1962	Zambia	Africa
H. sapiens	Kafue VI	1362	Gabel, 1962	0.00133	Gabel, 1962	Zambia	Africa
H. sapiens	Kafue XIV	1508	Gabel, 1962	0.00133	Gabel, 1962	Zambia	Africa
H. sapiens	Soutpansberg	1464	Steyn and Loots via Henneberg	0.00131	Henneberg	South Africa	Africa
H. sapiens	Bambandyanalo	1280	Galloway, 1959	0.00106	Galloway, 1959	Zimbabwe	Africa
H. sapiens	Bambandyanalo	1316.8	Galloway, 1959	0.00106	Galloway, 1959	Zimbabwe	Africa
H. sapiens	Bambandyanalo	1341.6	Galloway, 1959	0.00106	Galloway, 1959	Zimbabwe	Africa
H. sapiens	Bambandyanalo	1384.5	Galloway, 1959	0.00106	Galloway, 1959	Zimbabwe	Africa
H. sapiens	Bambandyanalo	1402.7	Galloway, 1959	0.00106	Galloway, 1959	Zimbabwe	Africa
H. sapiens	Bambandyanalo	1563	Galloway, 1959	0.00106	Galloway, 1959	Zimbabwe	Africa
H. sapiens	Bambandyanalo	1565.1	Galloway, 1959	0.00106	Galloway, 1959	Zimbabwe	Africa
H. sapiens	Gold Mines (Zimbabwe)	1161	Keith, 1924 via Henneberg	0.00102	Henneberg	Zimbabwe	Africa
H. sapiens	Mupungubue	1591	Galloway, 1937	0.001	Galloway, 1959	South Africa	Africa
H. sapiens	Dias Negress	1535	Winkler & Holler, 1988	0.00099	Winkler & Holler, 1988	Namibia	Africa
H. sapiens	Bristol 1	1526	Bedde, 1907	0.00075	Bedde, 1907	England	Europe
H. sapiens	Bristol 10	1688	Bedde, 1907	0.00075	Bedde, 1907	England	Europe
H. sapiens	Bristol 11	1655	Bedde, 1907	0.00075	Bedde, 1907	England	Europe
H. sapiens	Bristol 2	1859	Bedde, 1907	0.00075	Bedde, 1907	England	Europe
H. sapiens	Bristol 3	1381	Bedde, 1907	0.00075	Bedde, 1907	England	Europe
H. sapiens	Bristol 4	1608	Bedde, 1907	0.00075	Bedde, 1907	England	Europe
H. sapiens	Bristol 7	1390	Bedde, 1907	0.00075	Bedde, 1907	England	Europe
H. sapiens	Bristol 9	1422	Bedde, 1907	0.00075	Bedde, 1907	England	Europe
H. sapiens	Pecos	1030	Ruff et al., 1997	0.0005	Ruff et al., 1997	Pueblo Indigenous NA	North America
H. sapiens	Pecos	1100	Ruff et al., 1997	0.0005	Ruff et al., 1997	Pueblo Indigenous NA	North America
H. sapiens	Pecos	1120	Ruff et al., 1997	0.0005	Ruff et al., 1997	Pueblo Indigenous NA	North America
H. sapiens	Pecos	1140	Ruff et al., 1997	0.0005	Ruff et al., 1997	Pueblo Indigenous NA	North America
H. sapiens	Pecos	1155	Ruff et al., 1997	0.0005	Ruff et al., 1997	Pueblo Indigenous NA	North America
H. sapiens	Pecos	1178	Ruff et al., 1997	0.0005	Ruff et al., 1997	Pueblo Indigenous NA	North America
H. sapiens	Pecos	1190	Ruff et al., 1997	0.0005	Ruff et al., 1997	Pueblo Indigenous NA	North America
H. sapiens	Pecos	1270	Ruff et al., 1997	0.0005	Ruff et al., 1997	Pueblo Indigenous NA	North America
H. sapiens	Pecos	1275	Ruff et al., 1997	0.0005	Ruff et al., 1997	Pueblo Indigenous NA	North America
H. sapiens	Pecos	1285	Ruff et al., 1997	0.0005	Ruff et al., 1997	Pueblo Indigenous NA	North America
H. sapiens	Pecos	1300	Ruff et al., 1997	0.0005	Ruff et al., 1997	Pueblo Indigenous NA	North America
H. sapiens	Pecos	1300	Ruff et al., 1997	0.0005	Ruff et al., 1997	Pueblo Indigenous NA	North America
H. sapiens	Pecos	1300	Ruff et al., 1997	0.0005	Ruff et al., 1997	Pueblo Indigenous NA	North America
H. sapiens	Pecos	1320	Ruff et al., 1997	0.0005	Ruff et al., 1997	Pueblo Indigenous NA	North America
H. sapiens	Pecos	1325	Ruff et al., 1997	0.0005	Ruff et al., 1997	Pueblo Indigenous NA	North America
H. sapiens	Pecos	1340	Ruff et al., 1997	0.0005	Ruff et al., 1997	Pueblo Indigenous NA	North America
H. sapiens	Pecos	1350	Ruff et al., 1997	0.0005	Ruff et al., 1997	Pueblo Indigenous NA	North America
H. sapiens	Pecos	1350	Ruff et al., 1997	0.0005	Ruff et al., 1997	Pueblo Indigenous NA	North America
H. sapiens	Pecos	1350	Ruff et al., 1997	0.0005	Ruff et al., 1997	Pueblo Indigenous NA	North America
H. sapiens	Pecos	1350	Ruff et al., 1997	0.0005	Ruff et al., 1997	Pueblo Indigenous NA	North America
H. sapiens	Pecos	1380	Ruff et al., 1997	0.0005	Ruff et al., 1997	Pueblo Indigenous NA	North America
H. sapiens	Pecos	1380	Ruff et al., 1997	0.0005	Ruff et al., 1997	Pueblo Indigenous NA	North America
H. sapiens	Pecos	1390	Ruff et al., 1997	0.0005	Ruff et al., 1997	Pueblo Indigenous NA	North America
H. sapiens	Pecos	1400	Ruff et al., 1997	0.0005	Ruff et al., 1997	Pueblo Indigenous NA	North America
H. sapiens	Pecos	1410	Ruff et al., 1997	0.0005	Ruff et al., 1997	Pueblo Indigenous NA	North America
H. sapiens	Pecos	1440	Ruff et al., 1997	0.0005	Ruff et al., 1997	Pueblo Indigenous NA	North America
H. sapiens	Pecos	1465	Ruff et al., 1997	0.0005	Ruff et al., 1997	Pueblo Indigenous NA	North America
H. sapiens	Pecos	1500	Ruff et al., 1997	0.0005	Ruff et al., 1997	Pueblo Indigenous NA	North America
H. sapiens	Pecos	1550	Ruff et al., 1997	0.0005	Ruff et al., 1997	Pueblo Indigenous NA	North America
H. sapiens	Paderborne	1541	Ruff et al., 1997	0.00025	Old date a hoax; skull real, just recent	Germany	Europe
H. sapiens	Cape Flats	1230	Drennen, 1929	0.00015	Dusseldorp et al., 2013	South Africa	Africa
H. sapiens	China	1188	Brown	0.0001	Brown	China	Asia
H. sapiens	China	1207	Brown	0.0001	Brown	China	Asia
H. sapiens	China	1230	Brown	0.0001	Brown	China	Asia
H. sapiens	China	1230	Brown	0.0001	Brown	China	Asia
H. sapiens	China	1236	Brown	0.0001	Brown	China	Asia
H. sapiens	China	1274	Brown	0.0001	Brown	China	Asia
H. sapiens	China	1279	Brown	0.0001	Brown	China	Asia
H. sapiens	China	1287	Brown	0.0001	Brown	China	Asia
H. sapiens	China	1291	Brown	0.0001	Brown	China	Asia
H. sapiens	China	1294	Brown	0.0001	Brown	China	Asia
H. sapiens	China	1299	Brown	0.0001	Brown	China	Asia
H. sapiens	China	1305	Brown	0.0001	Brown	China	Asia
H. sapiens	China	1305	Brown	0.0001	Brown	China	Asia
H. sapiens	China	1313	Brown	0.0001	Brown	China	Asia
H. sapiens	China	1335	Brown	0.0001	Brown	China	Asia
H. sapiens	China	1337	Brown	0.0001	Brown	China	Asia
H. sapiens	China	1340	Brown	0.0001	Brown	China	Asia
H. sapiens	China	1361	Brown	0.0001	Brown	China	Asia
H. sapiens	China	1361	Brown	0.0001	Brown	China	Asia
H. sapiens	China	1376	Brown	0.0001	Brown	China	Asia
H. sapiens	China	1388	Brown	0.0001	Brown	China	Asia
H. sapiens	China	1389	Brown	0.0001	Brown	China	Asia
H. sapiens	China	1404	Brown	0.0001	Brown	China	Asia
H. sapiens	China	1408	Brown	0.0001	Brown	China	Asia
H. sapiens	China	1426	Brown	0.0001	Brown	China	Asia
H. sapiens	China	1429	Brown	0.0001	Brown	China	Asia
H. sapiens	China	1430	Brown	0.0001	Brown	China	Asia
H. sapiens	China	1452	Brown	0.0001	Brown	China	Asia
H. sapiens	China	1458	Brown	0.0001	Brown	China	Asia
H. sapiens	China	1467	Brown	0.0001	Brown	China	Asia
H. sapiens	China	1474	Brown	0.0001	Brown	China	Asia
H. sapiens	China	1482	Brown	0.0001	Brown	China	Asia
H. sapiens	China	1496	Brown	0.0001	Brown	China	Asia
H. sapiens	China	1503	Brown	0.0001	Brown	China	Asia
H. sapiens	China	1508	Brown	0.0001	Brown	China	Asia
H. sapiens	China	1512	Brown	0.0001	Brown	China	Asia
H. sapiens	China	1516	Brown	0.0001	Brown	China	Asia
H. sapiens	China	1528	Brown	0.0001	Brown	China	Asia
H. sapiens	China	1532	Brown	0.0001	Brown	China	Asia
H. sapiens	China	1537	Brown	0.0001	Brown	China	Asia
H. sapiens	China	1571	Brown	0.0001	Brown	China	Asia
H. sapiens	China	1575	Brown	0.0001	Brown	China	Asia
H. sapiens	China	1575	Brown	0.0001	Brown	China	Asia
H. sapiens	China	1577	Brown	0.0001	Brown	China	Asia
H. sapiens	China	1605	Brown	0.0001	Brown	China	Asia
H. sapiens	China	1608	Brown	0.0001	Brown	China	Asia
H. sapiens	China	1612	Brown	0.0001	Brown	China	Asia
H. sapiens	China	1619	Brown	0.0001	Brown	China	Asia
H. sapiens	China	1622	Brown	0.0001	Brown	China	Asia
H. sapiens	China	1632	Brown	0.0001	Brown	China	Asia
H. sapiens	China	1675	Brown	0.0001	Brown	China	Asia
H. sapiens	China	1682	Brown	0.0001	Brown	China	Asia
H. sapiens	China	1695	Brown	0.0001	Brown	China	Asia
H. sapiens	China	1776	Brown	0.0001	Brown	China	Asia
H. sapiens	Manjunath India	975.14	Manjunath	0.0001	Manjunath	India	Asia
H. sapiens	Manjunath India	1012	Manjunath	0.0001	Manjunath	India	Asia
H. sapiens	Manjunath India	1017	Manjunath	0.0001	Manjunath	India	Asia
H. sapiens	Manjunath India	1029	Manjunath	0.0001	Manjunath	India	Asia
H. sapiens	Manjunath India	1037	Manjunath	0.0001	Manjunath	India	Asia
H. sapiens	Manjunath India	1040	Manjunath	0.0001	Manjunath	India	Asia
H. sapiens	Manjunath India	1047.02	Manjunath	0.0001	Manjunath	India	Asia
H. sapiens	Manjunath India	1052	Manjunath	0.0001	Manjunath	India	Asia
H. sapiens	Manjunath India	1055	Manjunath	0.0001	Manjunath	India	Asia
H. sapiens	Manjunath India	1086.4	Manjunath	0.0001	Manjunath	India	Asia
H. sapiens	Manjunath India	1089.24	Manjunath	0.0001	Manjunath	India	Asia
H. sapiens	Manjunath India	1095	Manjunath	0.0001	Manjunath	India	Asia
H. sapiens	Manjunath India	1109.5	Manjunath	0.0001	Manjunath	India	Asia
H. sapiens	Manjunath India	1115.04	Manjunath	0.0001	Manjunath	India	Asia
H. sapiens	Manjunath India	1116	Manjunath	0.0001	Manjunath	India	Asia
H. sapiens	Manjunath India	1123.4	Manjunath	0.0001	Manjunath	India	Asia
H. sapiens	Manjunath India	1128.14	Manjunath	0.0001	Manjunath	India	Asia
H. sapiens	Manjunath India	1142	Manjunath	0.0001	Manjunath	India	Asia
H. sapiens	Manjunath India	1158.3	Manjunath	0.0001	Manjunath	India	Asia
H. sapiens	Manjunath India	1161.2	Manjunath	0.0001	Manjunath	India	Asia
H. sapiens	Manjunath India	1165.41	Manjunath	0.0001	Manjunath	India	Asia
H. sapiens	Manjunath India	1166	Manjunath	0.0001	Manjunath	India	Asia
H. sapiens	Manjunath India	1169	Manjunath	0.0001	Manjunath	India	Asia
H. sapiens	Manjunath India	1170	Manjunath	0.0001	Manjunath	India	Asia
H. sapiens	Manjunath India	1172	Manjunath	0.0001	Manjunath	India	Asia
H. sapiens	Manjunath India	1185.13	Manjunath	0.0001	Manjunath	India	Asia
H. sapiens	Manjunath India	1188.2	Manjunath	0.0001	Manjunath	India	Asia
H. sapiens	Manjunath India	1189	Manjunath	0.0001	Manjunath	India	Asia
H. sapiens	Manjunath India	1189	Manjunath	0.0001	Manjunath	India	Asia
H. sapiens	Manjunath India	1204.11	Manjunath	0.0001	Manjunath	India	Asia
H. sapiens	Manjunath India	1211.34	Manjunath	0.0001	Manjunath	India	Asia
H. sapiens	Manjunath India	1214.3	Manjunath	0.0001	Manjunath	India	Asia
H. sapiens	Manjunath India	1217.36	Manjunath	0.0001	Manjunath	India	Asia
H. sapiens	Manjunath India	1222.43	Manjunath	0.0001	Manjunath	India	Asia
H. sapiens	Manjunath India	1226.34	Manjunath	0.0001	Manjunath	India	Asia
H. sapiens	Manjunath India	1235	Manjunath	0.0001	Manjunath	India	Asia
H. sapiens	Manjunath India	1251	Manjunath	0.0001	Manjunath	India	Asia
H. sapiens	Manjunath India	1255.09	Manjunath	0.0001	Manjunath	India	Asia
H. sapiens	Manjunath India	1266.21	Manjunath	0.0001	Manjunath	India	Asia
H. sapiens	Manjunath India	1270.24	Manjunath	0.0001	Manjunath	India	Asia
H. sapiens	Manjunath India	1271	Manjunath	0.0001	Manjunath	India	Asia
H. sapiens	Manjunath India	1275	Manjunath	0.0001	Manjunath	India	Asia
H. sapiens	Manjunath India	1283	Manjunath	0.0001	Manjunath	India	Asia
H. sapiens	Manjunath India	1298	Manjunath	0.0001	Manjunath	India	Asia
H. sapiens	Manjunath India	1299	Manjunath	0.0001	Manjunath	India	Asia
H. sapiens	Manjunath India	1302.12	Manjunath	0.0001	Manjunath	India	Asia
H. sapiens	Manjunath India	1349	Manjunath	0.0001	Manjunath	India	Asia
H. sapiens	Manjunath India	1396	Manjunath	0.0001	Manjunath	India	Asia
H. sapiens	Manjunath India	1416	Manjunath	0.0001	Manjunath	India	Asia
H. sapiens	Manjunath India	1425.45	Manjunath	0.0001	Manjunath	India	Asia
H. sapiens	Murray Valley Aborigines	996	Brown	0.0001	Brown	Aboriginal	Australia
H. sapiens	Murray Valley Aborigines	1039	Brown	0.0001	Brown	Aboriginal	Australia
H. sapiens	Murray Valley Aborigines	1039	Brown	0.0001	Brown	Aboriginal	Australia
H. sapiens	Murray Valley Aborigines	1039	Brown	0.0001	Brown	Aboriginal	Australia
H. sapiens	Murray Valley Aborigines	1047	Brown	0.0001	Brown	Aboriginal	Australia
H. sapiens	Murray Valley Aborigines	1055	Brown	0.0001	Brown	Aboriginal	Australia
H. sapiens	Murray Valley Aborigines	1056	Brown	0.0001	Brown	Aboriginal	Australia
H. sapiens	Murray Valley Aborigines	1062	Brown	0.0001	Brown	Aboriginal	Australia
H. sapiens	Murray Valley Aborigines	1077	Brown	0.0001	Brown	Aboriginal	Australia
H. sapiens	Murray Valley Aborigines	1092	Brown	0.0001	Brown	Aboriginal	Australia
H. sapiens	Murray Valley Aborigines	1100	Brown	0.0001	Brown	Aboriginal	Australia
H. sapiens	Murray Valley Aborigines	1115	Brown	0.0001	Brown	Aboriginal	Australia
H. sapiens	Murray Valley Aborigines	1122	Brown	0.0001	Brown	Aboriginal	Australia
H. sapiens	Murray Valley Aborigines	1122	Brown	0.0001	Brown	Aboriginal	Australia
H. sapiens	Murray Valley Aborigines	1122	Brown	0.0001	Brown	Aboriginal	Australia
H. sapiens	Murray Valley Aborigines	1130	Brown	0.0001	Brown	Aboriginal	Australia
H. sapiens	Murray Valley Aborigines	1130	Brown	0.0001	Brown	Aboriginal	Australia
H. sapiens	Murray Valley Aborigines	1132	Brown	0.0001	Brown	Aboriginal	Australia
H. sapiens	Murray Valley Aborigines	1138	Brown	0.0001	Brown	Aboriginal	Australia
H. sapiens	Murray Valley Aborigines	1138	Brown	0.0001	Brown	Aboriginal	Australia
H. sapiens	Murray Valley Aborigines	1140	Brown	0.0001	Brown	Aboriginal	Australia
H. sapiens	Murray Valley Aborigines	1142	Brown	0.0001	Brown	Aboriginal	Australia
H. sapiens	Murray Valley Aborigines	1145	Brown	0.0001	Brown	Aboriginal	Australia
H. sapiens	Murray Valley Aborigines	1145	Brown	0.0001	Brown	Aboriginal	Australia
H. sapiens	Murray Valley Aborigines	1148	Brown	0.0001	Brown	Aboriginal	Australia
H. sapiens	Murray Valley Aborigines	1148	Brown	0.0001	Brown	Aboriginal	Australia
H. sapiens	Murray Valley Aborigines	1152	Brown	0.0001	Brown	Aboriginal	Australia
H. sapiens	Murray Valley Aborigines	1153	Brown	0.0001	Brown	Aboriginal	Australia
H. sapiens	Murray Valley Aborigines	1153	Brown	0.0001	Brown	Aboriginal	Australia
H. sapiens	Murray Valley Aborigines	1153	Brown	0.0001	Brown	Aboriginal	Australia
H. sapiens	Murray Valley Aborigines	1153	Brown	0.0001	Brown	Aboriginal	Australia
H. sapiens	Murray Valley Aborigines	1156	Brown	0.0001	Brown	Aboriginal	Australia
H. sapiens	Murray Valley Aborigines	1162	Brown	0.0001	Brown	Aboriginal	Australia
H. sapiens	Murray Valley Aborigines	1163	Brown	0.0001	Brown	Aboriginal	Australia
H. sapiens	Murray Valley Aborigines	1168	Brown	0.0001	Brown	Aboriginal	Australia
H. sapiens	Murray Valley Aborigines	1175	Brown	0.0001	Brown	Aboriginal	Australia
H. sapiens	Murray Valley Aborigines	1180	Brown	0.0001	Brown	Aboriginal	Australia
H. sapiens	Murray Valley Aborigines	1183	Brown	0.0001	Brown	Aboriginal	Australia
H. sapiens	Murray Valley Aborigines	1183	Brown	0.0001	Brown	Aboriginal	Australia
H. sapiens	Murray Valley Aborigines	1189	Brown	0.0001	Brown	Aboriginal	Australia
H. sapiens	Murray Valley Aborigines	1190	Brown	0.0001	Brown	Aboriginal	Australia
H. sapiens	Murray Valley Aborigines	1193	Brown	0.0001	Brown	Aboriginal	Australia
H. sapiens	Murray Valley Aborigines	1194	Brown	0.0001	Brown	Aboriginal	Australia
H. sapiens	Murray Valley Aborigines	1198	Brown	0.0001	Brown	Aboriginal	Australia
H. sapiens	Murray Valley Aborigines	1200	Brown	0.0001	Brown	Aboriginal	Australia
H. sapiens	Murray Valley Aborigines	1203	Brown	0.0001	Brown	Aboriginal	Australia
H. sapiens	Murray Valley Aborigines	1206	Brown	0.0001	Brown	Aboriginal	Australia
H. sapiens	Murray Valley Aborigines	1210	Brown	0.0001	Brown	Aboriginal	Australia
H. sapiens	Murray Valley Aborigines	1226	Brown	0.0001	Brown	Aboriginal	Australia
H. sapiens	Murray Valley Aborigines	1228	Brown	0.0001	Brown	Aboriginal	Australia
H. sapiens	Murray Valley Aborigines	1235	Brown	0.0001	Brown	Aboriginal	Australia
H. sapiens	Murray Valley Aborigines	1235	Brown	0.0001	Brown	Aboriginal	Australia
H. sapiens	Murray Valley Aborigines	1243	Brown	0.0001	Brown	Aboriginal	Australia
H. sapiens	Murray Valley Aborigines	1251	Brown	0.0001	Brown	Aboriginal	Australia
H. sapiens	Murray Valley Aborigines	1251	Brown	0.0001	Brown	Aboriginal	Australia
H. sapiens	Murray Valley Aborigines	1257	Brown	0.0001	Brown	Aboriginal	Australia
H. sapiens	Murray Valley Aborigines	1257	Brown	0.0001	Brown	Aboriginal	Australia
H. sapiens	Murray Valley Aborigines	1259	Brown	0.0001	Brown	Aboriginal	Australia
H. sapiens	Murray Valley Aborigines	1266	Brown	0.0001	Brown	Aboriginal	Australia
H. sapiens	Murray Valley Aborigines	1266	Brown	0.0001	Brown	Aboriginal	Australia
H. sapiens	Murray Valley Aborigines	1267	Brown	0.0001	Brown	Aboriginal	Australia
H. sapiens	Murray Valley Aborigines	1269	Brown	0.0001	Brown	Aboriginal	Australia
H. sapiens	Murray Valley Aborigines	1272	Brown	0.0001	Brown	Aboriginal	Australia
H. sapiens	Murray Valley Aborigines	1273	Brown	0.0001	Brown	Aboriginal	Australia
H. sapiens	Murray Valley Aborigines	1274	Brown	0.0001	Brown	Aboriginal	Australia
H. sapiens	Murray Valley Aborigines	1281	Brown	0.0001	Brown	Aboriginal	Australia
H. sapiens	Murray Valley Aborigines	1282	Brown	0.0001	Brown	Aboriginal	Australia
H. sapiens	Murray Valley Aborigines	1290	Brown	0.0001	Brown	Aboriginal	Australia
H. sapiens	Murray Valley Aborigines	1292	Brown	0.0001	Brown	Aboriginal	Australia
H. sapiens	Murray Valley Aborigines	1302	Brown	0.0001	Brown	Aboriginal	Australia
H. sapiens	Murray Valley Aborigines	1302	Brown	0.0001	Brown	Aboriginal	Australia
H. sapiens	Murray Valley Aborigines	1304	Brown	0.0001	Brown	Aboriginal	Australia
H. sapiens	Murray Valley Aborigines	1305	Brown	0.0001	Brown	Aboriginal	Australia
H. sapiens	Murray Valley Aborigines	1306	Brown	0.0001	Brown	Aboriginal	Australia
H. sapiens	Murray Valley Aborigines	1306	Brown	0.0001	Brown	Aboriginal	Australia
H. sapiens	Murray Valley Aborigines	1314	Brown	0.0001	Brown	Aboriginal	Australia
H. sapiens	Murray Valley Aborigines	1325	Brown	0.0001	Brown	Aboriginal	Australia
H. sapiens	Murray Valley Aborigines	1330	Brown	0.0001	Brown	Aboriginal	Australia
H. sapiens	Murray Valley Aborigines	1337	Brown	0.0001	Brown	Aboriginal	Australia
H. sapiens	Murray Valley Aborigines	1340	Brown	0.0001	Brown	Aboriginal	Australia
H. sapiens	Murray Valley Aborigines	1341	Brown	0.0001	Brown	Aboriginal	Australia
H. sapiens	Murray Valley Aborigines	1345	Brown	0.0001	Brown	Aboriginal	Australia
H. sapiens	Murray Valley Aborigines	1358	Brown	0.0001	Brown	Aboriginal	Australia
H. sapiens	Murray Valley Aborigines	1361	Brown	0.0001	Brown	Aboriginal	Australia
H. sapiens	Murray Valley Aborigines	1361	Brown	0.0001	Brown	Aboriginal	Australia
H. sapiens	Murray Valley Aborigines	1369	Brown	0.0001	Brown	Aboriginal	Australia
H. sapiens	Murray Valley Aborigines	1377	Brown	0.0001	Brown	Aboriginal	Australia
H. sapiens	Murray Valley Aborigines	1389	Brown	0.0001	Brown	Aboriginal	Australia
H. sapiens	Murray Valley Aborigines	1390	Brown	0.0001	Brown	Aboriginal	Australia
H. sapiens	Murray Valley Aborigines	1398	Brown	0.0001	Brown	Aboriginal	Australia
H. sapiens	Murray Valley Aborigines	1432	Brown	0.0001	Brown	Aboriginal	Australia
H. sapiens	N. China	1140	Brown	0.0001	Brown	China	Asia
H. sapiens	N. China	1200	Brown	0.0001	Brown	China	Asia
H. sapiens	N. China	1240	Brown	0.0001	Brown	China	Asia
H. sapiens	N. China	1262	Brown	0.0001	Brown	China	Asia
H. sapiens	N. China	1280	Brown	0.0001	Brown	China	Asia
H. sapiens	N. China	1280	Brown	0.0001	Brown	China	Asia
H. sapiens	N. China	1280	Brown	0.0001	Brown	China	Asia
H. sapiens	N. China	1290	Brown	0.0001	Brown	China	Asia
H. sapiens	N. China	1299	Brown	0.0001	Brown	China	Asia
H. sapiens	N. China	1300	Brown	0.0001	Brown	China	Asia
H. sapiens	N. China	1300	Brown	0.0001	Brown	China	Asia
H. sapiens	N. China	1320	Brown	0.0001	Brown	China	Asia
H. sapiens	N. China	1326	Brown	0.0001	Brown	China	Asia
H. sapiens	N. China	1330	Brown	0.0001	Brown	China	Asia
H. sapiens	N. China	1340	Brown	0.0001	Brown	China	Asia
H. sapiens	N. China	1340	Brown	0.0001	Brown	China	Asia
H. sapiens	N. China	1359	Brown	0.0001	Brown	China	Asia
H. sapiens	N. China	1360	Brown	0.0001	Brown	China	Asia
H. sapiens	N. China	1360	Brown	0.0001	Brown	China	Asia
H. sapiens	N. China	1372	Brown	0.0001	Brown	China	Asia
H. sapiens	N. China	1390	Brown	0.0001	Brown	China	Asia
H. sapiens	N. China	1390	Brown	0.0001	Brown	China	Asia
H. sapiens	N. China	1410	Brown	0.0001	Brown	China	Asia
H. sapiens	N. China	1420	Brown	0.0001	Brown	China	Asia
H. sapiens	N. China	1420	Brown	0.0001	Brown	China	Asia
H. sapiens	N. China	1440	Brown	0.0001	Brown	China	Asia
H. sapiens	N. China	1440	Brown	0.0001	Brown	China	Asia
H. sapiens	N. China	1440	Brown	0.0001	Brown	China	Asia
H. sapiens	N. China	1448	Brown	0.0001	Brown	China	Asia
H. sapiens	N. China	1450	Brown	0.0001	Brown	China	Asia
H. sapiens	N. China	1452	Brown	0.0001	Brown	China	Asia
H. sapiens	N. China	1453	Brown	0.0001	Brown	China	Asia
H. sapiens	N. China	1460	Brown	0.0001	Brown	China	Asia
H. sapiens	N. China	1460	Brown	0.0001	Brown	China	Asia
H. sapiens	N. China	1490	Brown	0.0001	Brown	China	Asia
H. sapiens	N. China	1540	Brown	0.0001	Brown	China	Asia
H. sapiens	N. China	1600	Brown	0.0001	Brown	China	Asia
H. sapiens	Spitalfields	1005	Brown	0.0001	Brown	England	Europe
H. sapiens	Spitalfields	1120	Brown	0.0001	Brown	England	Europe
H. sapiens	Spitalfields	1160	Brown	0.0001	Brown	England	Europe
H. sapiens	Spitalfields	1165	Brown	0.0001	Brown	England	Europe
H. sapiens	Spitalfields	1175	Brown	0.0001	Brown	England	Europe
H. sapiens	Spitalfields	1180	Brown	0.0001	Brown	England	Europe
H. sapiens	Spitalfields	1180	Brown	0.0001	Brown	England	Europe
H. sapiens	Spitalfields	1190	Brown	0.0001	Brown	England	Europe
H. sapiens	Spitalfields	1195	Brown	0.0001	Brown	England	Europe
H. sapiens	Spitalfields	1215	Brown	0.0001	Brown	England	Europe
H. sapiens	Spitalfields	1225	Brown	0.0001	Brown	England	Europe
H. sapiens	Spitalfields	1230	Brown	0.0001	Brown	England	Europe
H. sapiens	Spitalfields	1230	Brown	0.0001	Brown	England	Europe
H. sapiens	Spitalfields	1240	Brown	0.0001	Brown	England	Europe
H. sapiens	Spitalfields	1250	Brown	0.0001	Brown	England	Europe
H. sapiens	Spitalfields	1250	Brown	0.0001	Brown	England	Europe
H. sapiens	Spitalfields	1260	Brown	0.0001	Brown	England	Europe
H. sapiens	Spitalfields	1260	Brown	0.0001	Brown	England	Europe
H. sapiens	Spitalfields	1270	Brown	0.0001	Brown	England	Europe
H. sapiens	Spitalfields	1290	Brown	0.0001	Brown	England	Europe
H. sapiens	Spitalfields	1310	Brown	0.0001	Brown	England	Europe
H. sapiens	Spitalfields	1310	Brown	0.0001	Brown	England	Europe
H. sapiens	Spitalfields	1320	Brown	0.0001	Brown	England	Europe
H. sapiens	Spitalfields	1340	Brown	0.0001	Brown	England	Europe
H. sapiens	Spitalfields	1340	Brown	0.0001	Brown	England	Europe
H. sapiens	Spitalfields	1350	Brown	0.0001	Brown	England	Europe
H. sapiens	Spitalfields	1350	Brown	0.0001	Brown	England	Europe
H. sapiens	Spitalfields	1360	Brown	0.0001	Brown	England	Europe
H. sapiens	Spitalfields	1360	Brown	0.0001	Brown	England	Europe
H. sapiens	Spitalfields	1360	Brown	0.0001	Brown	England	Europe
H. sapiens	Spitalfields	1380	Brown	0.0001	Brown	England	Europe
H. sapiens	Spitalfields	1390	Brown	0.0001	Brown	England	Europe
H. sapiens	Spitalfields	1410	Brown	0.0001	Brown	England	Europe
H. sapiens	Spitalfields	1420	Brown	0.0001	Brown	England	Europe
H. sapiens	Spitalfields	1440	Brown	0.0001	Brown	England	Europe
H. sapiens	Spitalfields	1455	Brown	0.0001	Brown	England	Europe
H. sapiens	Spitalfields	1460	Brown	0.0001	Brown	England	Europe
H. sapiens	Spitalfields	1475	Brown	0.0001	Brown	England	Europe
H. sapiens	Spitalfields	1565	Brown	0.0001	Brown	England	Europe
H. sapiens	Swanport Aborigines	1020	Brown	0.0001	Brown	Aboriginal	Australia
H. sapiens	Swanport Aborigines	1050	Brown	0.0001	Brown	Aboriginal	Australia
H. sapiens	Swanport Aborigines	1050	Brown	0.0001	Brown	Aboriginal	Australia
H. sapiens	Swanport Aborigines	1055	Brown	0.0001	Brown	Aboriginal	Australia
H. sapiens	Swanport Aborigines	1065	Brown	0.0001	Brown	Aboriginal	Australia
H. sapiens	Swanport Aborigines	1065	Brown	0.0001	Brown	Aboriginal	Australia
H. sapiens	Swanport Aborigines	1070	Brown	0.0001	Brown	Aboriginal	Australia
H. sapiens	Swanport Aborigines	1075	Brown	0.0001	Brown	Aboriginal	Australia
H. sapiens	Swanport Aborigines	1080	Brown	0.0001	Brown	Aboriginal	Australia
H. sapiens	Swanport Aborigines	1100	Brown	0.0001	Brown	Aboriginal	Australia
H. sapiens	Swanport Aborigines	1100	Brown	0.0001	Brown	Aboriginal	Australia
H. sapiens	Swanport Aborigines	1105	Brown	0.0001	Brown	Aboriginal	Australia
H. sapiens	Swanport Aborigines	1115	Brown	0.0001	Brown	Aboriginal	Australia
H. sapiens	Swanport Aborigines	1120	Brown	0.0001	Brown	Aboriginal	Australia
H. sapiens	Swanport Aborigines	1140	Brown	0.0001	Brown	Aboriginal	Australia
H. sapiens	Swanport Aborigines	1145	Brown	0.0001	Brown	Aboriginal	Australia
H. sapiens	Swanport Aborigines	1155	Brown	0.0001	Brown	Aboriginal	Australia
H. sapiens	Swanport Aborigines	1165	Brown	0.0001	Brown	Aboriginal	Australia
H. sapiens	Swanport Aborigines	1185	Brown	0.0001	Brown	Aboriginal	Australia
H. sapiens	Swanport Aborigines	1185	Brown	0.0001	Brown	Aboriginal	Australia
H. sapiens	Swanport Aborigines	1190	Brown	0.0001	Brown	Aboriginal	Australia
H. sapiens	Swanport Aborigines	1195	Brown	0.0001	Brown	Aboriginal	Australia
H. sapiens	Swanport Aborigines	1195	Brown	0.0001	Brown	Aboriginal	Australia
H. sapiens	Swanport Aborigines	1195	Brown	0.0001	Brown	Aboriginal	Australia
H. sapiens	Swanport Aborigines	1200	Brown	0.0001	Brown	Aboriginal	Australia
H. sapiens	Swanport Aborigines	1215	Brown	0.0001	Brown	Aboriginal	Australia
H. sapiens	Swanport Aborigines	1225	Brown	0.0001	Brown	Aboriginal	Australia
H. sapiens	Swanport Aborigines	1230	Brown	0.0001	Brown	Aboriginal	Australia
H. sapiens	Swanport Aborigines	1235	Brown	0.0001	Brown	Aboriginal	Australia
H. sapiens	Swanport Aborigines	1235	Brown	0.0001	Brown	Aboriginal	Australia
H. sapiens	Swanport Aborigines	1235	Brown	0.0001	Brown	Aboriginal	Australia
H. sapiens	Swanport Aborigines	1240	Brown	0.0001	Brown	Aboriginal	Australia
H. sapiens	Swanport Aborigines	1245	Brown	0.0001	Brown	Aboriginal	Australia
H. sapiens	Swanport Aborigines	1260	Brown	0.0001	Brown	Aboriginal	Australia
H. sapiens	Swanport Aborigines	1260	Brown	0.0001	Brown	Aboriginal	Australia
H. sapiens	Swanport Aborigines	1260	Brown	0.0001	Brown	Aboriginal	Australia
H. sapiens	Swanport Aborigines	1275	Brown	0.0001	Brown	Aboriginal	Australia
H. sapiens	Swanport Aborigines	1280	Brown	0.0001	Brown	Aboriginal	Australia
H. sapiens	Swanport Aborigines	1295	Brown	0.0001	Brown	Aboriginal	Australia
H. sapiens	Swanport Aborigines	1295	Brown	0.0001	Brown	Aboriginal	Australia
H. sapiens	Swanport Aborigines	1310	Brown	0.0001	Brown	Aboriginal	Australia
H. sapiens	Swanport Aborigines	1310	Brown	0.0001	Brown	Aboriginal	Australia
H. sapiens	Swanport Aborigines	1315	Brown	0.0001	Brown	Aboriginal	Australia
H. sapiens	Swanport Aborigines	1325	Brown	0.0001	Brown	Aboriginal	Australia
H. sapiens	Swanport Aborigines	1335	Brown	0.0001	Brown	Aboriginal	Australia
H. sapiens	Swanport Aborigines	1340	Brown	0.0001	Brown	Aboriginal	Australia
H. sapiens	Swanport Aborigines	1365	Brown	0.0001	Brown	Aboriginal	Australia
H. sapiens	Swanport Aborigines	1400	Brown	0.0001	Brown	Aboriginal	Australia
H. sapiens	Swanport Aborigines	1405	Brown	0.0001	Brown	Aboriginal	Australia
H. sapiens	Swanport Aborigines	1535	Brown	0.0001	Brown	Aboriginal	Australia
H. sapiens	Terry Collection	1046.2	Copes	0.0001	van Sickle et al., 2022	USA	North America
H. sapiens	Terry Collection	1076	Copes	0.0001	van Sickle et al., 2022	USA	North America
H. sapiens	Terry Collection	1080.4	Copes	0.0001	van Sickle et al., 2022	USA	North America
H. sapiens	Terry Collection	1094	Copes	0.0001	van Sickle et al., 2022	USA	North America
H. sapiens	Terry Collection	1102.4	Copes	0.0001	van Sickle et al., 2022	USA	North America
H. sapiens	Terry Collection	1110.9	Copes	0.0001	van Sickle et al., 2022	USA	North America
H. sapiens	Terry Collection	1118.9	Copes	0.0001	van Sickle et al., 2022	USA	North America
H. sapiens	Terry Collection	1180.9	Copes	0.0001	van Sickle et al., 2022	USA	North America
H. sapiens	Terry Collection	1196.9	Copes	0.0001	van Sickle et al., 2022	USA	North America
H. sapiens	Terry Collection	1200.8	Copes	0.0001	van Sickle et al., 2022	USA	North America
H. sapiens	Terry Collection	1206	Copes	0.0001	van Sickle et al., 2022	USA	North America
H. sapiens	Terry Collection	1208.5	Copes	0.0001	van Sickle et al., 2022	USA	North America
H. sapiens	Terry Collection	1215.2	Copes	0.0001	van Sickle et al., 2022	USA	North America
H. sapiens	Terry Collection	1226.5	Copes	0.0001	van Sickle et al., 2022	USA	North America
H. sapiens	Terry Collection	1232.1	Copes	0.0001	van Sickle et al., 2022	USA	North America
H. sapiens	Terry Collection	1238.9	Copes	0.0001	van Sickle et al., 2022	USA	North America
H. sapiens	Terry Collection	1240.8	Copes	0.0001	van Sickle et al., 2022	USA	North America
H. sapiens	Terry Collection	1244.1	Copes	0.0001	van Sickle et al., 2022	USA	North America
H. sapiens	Terry Collection	1247	Copes	0.0001	van Sickle et al., 2022	USA	North America
H. sapiens	Terry Collection	1248.8	Copes	0.0001	van Sickle et al., 2022	USA	North America
H. sapiens	Terry Collection	1257.9	Copes	0.0001	van Sickle et al., 2022	USA	North America
H. sapiens	Terry Collection	1260.3	Copes	0.0001	van Sickle et al., 2022	USA	North America
H. sapiens	Terry Collection	1262.1	Copes	0.0001	van Sickle et al., 2022	USA	North America
H. sapiens	Terry Collection	1264	Copes	0.0001	van Sickle et al., 2022	USA	North America
H. sapiens	Terry Collection	1267.3	Copes	0.0001	van Sickle et al., 2022	USA	North America
H. sapiens	Terry Collection	1271.9	Copes	0.0001	van Sickle et al., 2022	USA	North America
H. sapiens	Terry Collection	1282.8	Copes	0.0001	van Sickle et al., 2022	USA	North America
H. sapiens	Terry Collection	1283.7	Copes	0.0001	van Sickle et al., 2022	USA	North America
H. sapiens	Terry Collection	1287.7	Copes	0.0001	van Sickle et al., 2022	USA	North America
H. sapiens	Terry Collection	1299.5	Copes	0.0001	van Sickle et al., 2022	USA	North America
H. sapiens	Terry Collection	1303.8	Copes	0.0001	van Sickle et al., 2022	USA	North America
H. sapiens	Terry Collection	1304.5	Copes	0.0001	van Sickle et al., 2022	USA	North America
H. sapiens	Terry Collection	1310.9	Copes	0.0001	van Sickle et al., 2022	USA	North America
H. sapiens	Terry Collection	1319.4	Copes	0.0001	van Sickle et al., 2022	USA	North America
H. sapiens	Terry Collection	1325.2	Copes	0.0001	van Sickle et al., 2022	USA	North America
H. sapiens	Terry Collection	1326.2	Copes	0.0001	van Sickle et al., 2022	USA	North America
H. sapiens	Terry Collection	1334.8	Copes	0.0001	van Sickle et al., 2022	USA	North America
H. sapiens	Terry Collection	1336.7	Copes	0.0001	van Sickle et al., 2022	USA	North America
H. sapiens	Terry Collection	1337.8	Copes	0.0001	van Sickle et al., 2022	USA	North America
H. sapiens	Terry Collection	1339.7	Copes	0.0001	van Sickle et al., 2022	USA	North America
H. sapiens	Terry Collection	1349.1	Copes	0.0001	van Sickle et al., 2022	USA	North America
H. sapiens	Terry Collection	1351.2	Copes	0.0001	van Sickle et al., 2022	USA	North America
H. sapiens	Terry Collection	1356.7	Copes	0.0001	van Sickle et al., 2022	USA	North America
H. sapiens	Terry Collection	1366	Copes	0.0001	van Sickle et al., 2022	USA	North America
H. sapiens	Terry Collection	1369.7	Copes	0.0001	van Sickle et al., 2022	USA	North America
H. sapiens	Terry Collection	1373.3	Copes	0.0001	van Sickle et al., 2022	USA	North America
H. sapiens	Terry Collection	1379.6	Copes	0.0001	van Sickle et al., 2022	USA	North America
H. sapiens	Terry Collection	1381.2	Copes	0.0001	van Sickle et al., 2022	USA	North America
H. sapiens	Terry Collection	1381.3	Copes	0.0001	van Sickle et al., 2022	USA	North America
H. sapiens	Terry Collection	1383.7	Copes	0.0001	van Sickle et al., 2022	USA	North America
H. sapiens	Terry Collection	1391.7	Copes	0.0001	van Sickle et al., 2022	USA	North America
H. sapiens	Terry Collection	1392.1	Copes	0.0001	van Sickle et al., 2022	USA	North America
H. sapiens	Terry Collection	1396.6	Copes	0.0001	van Sickle et al., 2022	USA	North America
H. sapiens	Terry Collection	1400.2	Copes	0.0001	van Sickle et al., 2022	USA	North America
H. sapiens	Terry Collection	1405.8	Copes	0.0001	van Sickle et al., 2022	USA	North America
H. sapiens	Terry Collection	1406.3	Copes	0.0001	van Sickle et al., 2022	USA	North America
H. sapiens	Terry Collection	1409.5	Copes	0.0001	van Sickle et al., 2022	USA	North America
H. sapiens	Terry Collection	1414.6	Copes	0.0001	van Sickle et al., 2022	USA	North America
H. sapiens	Terry Collection	1417.3	Copes	0.0001	van Sickle et al., 2022	USA	North America
H. sapiens	Terry Collection	1419.1	Copes	0.0001	van Sickle et al., 2022	USA	North America
H. sapiens	Terry Collection	1420.5	Copes	0.0001	van Sickle et al., 2022	USA	North America
H. sapiens	Terry Collection	1427.1	Copes	0.0001	van Sickle et al., 2022	USA	North America
H. sapiens	Terry Collection	1427.9	Copes	0.0001	van Sickle et al., 2022	USA	North America
H. sapiens	Terry Collection	1431.2	Copes	0.0001	van Sickle et al., 2022	USA	North America
H. sapiens	Terry Collection	1435.7	Copes	0.0001	van Sickle et al., 2022	USA	North America
H. sapiens	Terry Collection	1441.6	Copes	0.0001	van Sickle et al., 2022	USA	North America
H. sapiens	Terry Collection	1458.6	Copes	0.0001	van Sickle et al., 2022	USA	North America
H. sapiens	Terry Collection	1461.3	Copes	0.0001	van Sickle et al., 2022	USA	North America
H. sapiens	Terry Collection	1465.1	Copes	0.0001	van Sickle et al., 2022	USA	North America
H. sapiens	Terry Collection	1466.2	Copes	0.0001	van Sickle et al., 2022	USA	North America
H. sapiens	Terry Collection	1470.2	Copes	0.0001	van Sickle et al., 2022	USA	North America
H. sapiens	Terry Collection	1470.4	Copes	0.0001	van Sickle et al., 2022	USA	North America
H. sapiens	Terry Collection	1479	Copes	0.0001	van Sickle et al., 2022	USA	North America
H. sapiens	Terry Collection	1493.6	Copes	0.0001	van Sickle et al., 2022	USA	North America
H. sapiens	Terry Collection	1493.7	Copes	0.0001	van Sickle et al., 2022	USA	North America
H. sapiens	Terry Collection	1495.1	Copes	0.0001	van Sickle et al., 2022	USA	North America
H. sapiens	Terry Collection	1502.6	Copes	0.0001	van Sickle et al., 2022	USA	North America
H. sapiens	Terry Collection	1504.8	Copes	0.0001	van Sickle et al., 2022	USA	North America
H. sapiens	Terry Collection	1513.8	Copes	0.0001	van Sickle et al., 2022	USA	North America
H. sapiens	Terry Collection	1514	Copes	0.0001	van Sickle et al., 2022	USA	North America
H. sapiens	Terry Collection	1514.9	Copes	0.0001	van Sickle et al., 2022	USA	North America
H. sapiens	Terry Collection	1526	Copes	0.0001	van Sickle et al., 2022	USA	North America
H. sapiens	Terry Collection	1526.9	Copes	0.0001	van Sickle et al., 2022	USA	North America
H. sapiens	Terry Collection	1527.5	Copes	0.0001	van Sickle et al., 2022	USA	North America
H. sapiens	Terry Collection	1566.4	Copes	0.0001	van Sickle et al., 2022	USA	North America
H. sapiens	Terry Collection	1581.5	Copes	0.0001	van Sickle et al., 2022	USA	North America
H. sapiens	Terry Collection	1582.4	Copes	0.0001	van Sickle et al., 2022	USA	North America
H. sapiens	Terry Collection	1608.2	Copes	0.0001	van Sickle et al., 2022	USA	North America
H. sapiens	Terry Collection	1618.1	Copes	0.0001	van Sickle et al., 2022	USA	North America
H. sapiens	Terry Collection	1622.6	Copes	0.0001	van Sickle et al., 2022	USA	North America
H. sapiens	Terry Collection	1645	Copes	0.0001	van Sickle et al., 2022	USA	North America
H. sapiens	Terry Collection	1650.4	Copes	0.0001	van Sickle et al., 2022	USA	North America
H. sapiens	Terry Collection	1713.2	Copes	0.0001	van Sickle et al., 2022	USA	North America
H. sapiens	Terry Collection	1724	Copes	0.0001	van Sickle et al., 2022	USA	North America
